# Supplementary material for: Vertical movement symmetry of the withers in horses with induced forelimb and hindlimb lameness at trot
Source: PubMed Central journal article supplement (PMC6175082; doi:10.1111/evj.12844), 2018-05-17
Supplement: EVJ-50-818-s001.pdf [file EVJ-50-818-s001.pdf]

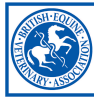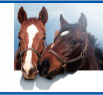

**Supplementary Item 1:** Model output (number of strides = 1183) in models where asymmetry parameters and stride duration are evaluated for their statistical contribution to the models. The dataset includes all trials with absolute mean values for HDmin  $\geq$  6 mm. (For other parameters and models stride duration was not significant.)

---

| Analysis          | Dependent variable | Independent variable | Estimate | SE    | P-value |
|-------------------|--------------------|----------------------|----------|-------|---------|
| Forelimb lameness | WDmax              | Intercept            | 21.15    | 10.13 | 0.04    |
|                   |                    | HDmax                | 0.10     | 0.01  | <0.0001 |
|                   |                    | Stride duration (s)  | -31.77   | 13.82 | 0.02    |
|                   | WDup               | Intercept            | 34.95    | 18.53 | 0.06    |
|                   |                    | HDup                 | 0.07     | 0.01  | <0.0001 |
|                   |                    | Stride duration (s)  | -50.76   | 25.74 | 0.05    |

---
